# Supplementary material for: Two samarium(iii) complexes with tunable fluorescence from in situ reactions of 2-ethoxy-6-((pyridin-2-ylmethylimino)methyl)phenol with Sm3+ ion
Source: Royal Society of Chemistry journal article supplement (doi:10.1039/c6ra20957b), 2016-01-01

## Supporting Information

### Two samarium(III) complexes with tunable fluorescence from *in situ* reactions of 2-ethoxy-6-((pyridin-2-ylmethylimino)-methyl)phenol with Sm<sup>3+</sup> ion

Qin Wei, Zhi-Peng Zheng\*, Hai-Xin Feng, Xue-Jia Hong, Xia Huang, Hai-Jun Peng, and Yue-Peng Cai\*

School of Chemistry and Environment, South China Normal University; Guangzhou Key Laboratory of Materials for Energy Conversion and Storage; Guangzhou Key Laboratory of Materials for Energy Conversion and Storage; Guangdong Provincial Engineering Technology Research Center for Materials for Energy Conversion and Storage, Guangzhou 510006, P.R. China

## Contents

1. **Table S1.** Selected bond lengths and angles for compounds **1-2**.
2. **Table S2.** Hydrogen bond parameters of compounds **1** and **2**.
3. **Table S3.** The related parameters for luminescent complexes **1** and **2**.
4. **Figure S1.** 3-D supramolecular network assembled by hydrogen bonding C(O)-H $\cdots$ O(N) and  $\pi\cdots\pi$  packing interactions in *ab* plane for **1**.
5. **Figure S2.** 2-D supramolecular layer assembled by hydrogen bonding C(O)-H $\cdots$ O interactions in *ab* plane for **2**.
6. **Figure S3.** Powder X-ray diffraction (PXRD) patterns (Experimental and Simulated) of **1-2**.
7. **Figure S4.** TGA curves of complexes **1-2**.
8. **Figure S5.** UV-vis absorption spectra of complexes **1-2** in MeCN (concentrations:  $1 \times 10^{-5}$  M).
9. **Figure S6.** Lifetime for **1** and **2** at room temperature ( $\lambda_{\text{ex}} = 345$  nm).

**Table S1.** Selected bond lengths (Å) and bond angles (°) for compounds **1-2**.

| <b>1</b>        |           |                 |           |
|-----------------|-----------|-----------------|-----------|
| Sm(1)-N(1)      | 2.681(2)  | O(6)-Sm(1)-O(2) | 167.53(8) |
| Sm(1)-N(2)      | 2.667(2)  | O(6)-Sm(1)-N(6) | 67.18(8)  |
| Sm(1)-N(3)      | 2.705(3)  | O(2)-Sm(1)-N(6) | 118.14(7) |
| Sm(1)-N(4)      | 2.774(2)  | O(6)-Sm(1)-N(2) | 117.98(7) |
| Sm(1)-N(5)      | 2.672(3)  | O(2)-Sm(1)-N(2) | 66.54(6)  |
| Sm(1)-N(6)      | 2.622(3)  | N(6)-Sm(1)-N(2) | 138.22(8) |
| Sm(1)-N(7)      | 2.724(3)  | O(6)-Sm(1)-N(5) | 118.80(8) |
| Sm(1)-N(8)      | 2.747 (2) | O(2)-Sm(1)-N(5) | 72.38(7)  |
| Sm(1)-O(2)      | 2.398(2)  | N(6)-Sm(1)-N(5) | 61.42(8)  |
| Sm(1)-O(6)      | 2.398(2)  | N(2)-Sm(1)-N(5) | 84.19(8)  |
| N(5)-Sm(1)-N(8) | 64.85(7)  | O(6)-Sm(1)-N(1) | 74.08(8)  |
| N(1)-Sm(1)-N(8) | 130.92(7) | O(2)-Sm(1)-N(1) | 116.98(7) |
| N(3)-Sm(1)-N(8) | 105.43(7) | N(6)-Sm(1)-N(1) | 82.73(7)  |
| N(7)-Sm(1)-N(8) | 59.70(8)  | N(2)-Sm(1)-N(1) | 61.95(7)  |
| O(6)-Sm(1)-N(4) | 61.74(8)  | N(5)-Sm(1)-N(1) | 68.81(7)  |
| O(2)-Sm(1)-N(4) | 116.18(7) | O(6)-Sm(1)-N(3) | 94.29(8)  |
| N(6)-Sm(1)-N(4) | 124.89(7) | O(2)-Sm(1)-N(3) | 75.07(8)  |
| N(2)-Sm(1)-N(4) | 61.02(8)  | N(6)-Sm(1)-N(3) | 144.69(8) |
| N(5)-Sm(1)-N(4) | 131.28(7) | N(2)-Sm(1)-N(3) | 76.75(8)  |
| N(1)-Sm(1)-N(4) | 65.06(7)  | N(5)-Sm(1)-N(3) | 146.74(8) |
| N(3)-Sm(1)-N(4) | 60.09(7)  | N(1)-Sm(1)-N(3) | 122.31(7) |
| N(7)-Sm(1)-N(4) | 105.32(8) | O(6)-Sm(1)-N(7) | 74.63(7)  |
| N(2)-Sm(1)-N(8) | 126.06(7) | O(2)-Sm(1)-N(7) | 94.91(7)  |
| N(8)-Sm(1)-N(4) | 163.69(7) | N(6)-Sm(1)-N(7) | 78.84(8)  |
| N(3)-Sm(1)-N(7) | 67.03(8)  | N(2)-Sm(1)-N(7) | 142.71(8) |
| O(6)-Sm(1)-N(8) | 115.57(7) | N(5)-Sm(1)-N(7) | 122.24(7) |
| O(2)-Sm(1)-N(8) | 62.55(7)  | N(1)-Sm(1)-N(7) | 147.92(8) |
| N(6)-Sm(1)-N(8) | 61.71(7)  |                 |           |

---

**2**

---

|                   |            |                     |            |
|-------------------|------------|---------------------|------------|
| Sm(1)-N(3)        | 2.336(4)   | O(2)-Sm(1)-N(3)#1   | 147.85(17) |
| Sm(1)-N(3)#1      | 2.314(4)   | O(2)-Sm(1)-N(3)     | 135.33(16) |
| Sm(1)-N(1)        | 2.470(5)   | N(3)-Sm(1)-N(3)#1   | 71.12(17)  |
| Sm(1)-N(4)#1      | 2.591(5)   | O(2)-Sm(1)-O(4)     | 81.98(17)  |
| Sm(1)-N(2)        | 2.680(6)   | N(3)-Sm(1)-O(4)#1   | 86.62(16)  |
| Sm(1)-O(2)        | 2.451(5)   | N(3)-Sm(1)-O(4)     | 135.34(16) |
| Sm(1)-O(3)        | 2.227(4)   | O(2)-Sm(1)-N(1)     | 72.34(17)  |
| Sm(1)-O(4)        | 2.471(5)   | N(3)-Sm(1)-N(1)#1   | 138.18(15) |
| O(4)-Sm(1)-N(4)#1 | 72.91(18)  | N(3)-Sm(1)-N(1)     | 67.36(16)  |
| N(1)-Sm(1)-N(4)#1 | 149.40(17) | O(4)-Sm(1)-N(1)     | 120.14(18) |
| O(3)-Sm(1)-N(4)#1 | 78.75(17)  | O(2)-Sm(1)-O(3)     | 81.32(17)  |
| O(2)-Sm(1)-N(2)   | 106.33(17) | N(3)-Sm(1)-O(3)#1   | 93.55(17)  |
| N(3)-Sm(1)-N(2)#1 | 99.46(15)  | N(3)-Sm(1)-O(3)     | 73.24(15)  |
| N(3)-Sm(1)-N(2)   | 71.45(15)  | O(4)-Sm(1)-O(3)     | 148.48(17) |
| O(4)-Sm(1)-N(2)   | 74.91(17)  | N(1)-Sm(1)-O(3)     | 79.41(17)  |
| N(1)-Sm(1)-N(2)   | 62.80(16)  | O(2)-Sm(1)-N(4)#1   | 83.36(18)  |
| O(3)-Sm(1)-N(2)   | 135.69(17) | N(3)#1-Sm(1)-N(4)#1 | 64.53(16)  |
| N(4)#1-Sm(1)-N(2) | 144.63(17) | N(3)-Sm(1)-N(4)#1   | 125.09(16) |

Symmetry transformations used to generate equivalent atoms: #1  $-x+2, -y+2, -z+1$ .

**Table S2.** Hydrogen bond parameters of compounds **1** and **2**.

| D-H...A               | d (D-H) (Å) | d (H...A) (Å) | d (D...A) (Å) | ∠ DHA (°) |
|-----------------------|-------------|---------------|---------------|-----------|
| <b>1</b>              |             |               |               |           |
| O(4)-H(4A)...O(1W)    | 0.82        | 2.06          | 2.720(5)      | 137.3     |
| O(8)-H(8)...O(7)#1    | 0.82        | 2.23          | 2.683(4)      | 115.2     |
| O(1W)-H(1WB)...O(3)   | 0.85        | 2.38          | 3.199(7)      | 162.4     |
| C(1)-H(1)...N(6)      | 0.93        | 2.70          | 3.407(4)      | 133.9     |
| C(14)-H(14A)...O(7)#2 | 0.97        | 2.65          | 3.585(6)      | 161.8     |
| C(16)-H(16)...O(2)    | 0.93        | 2.58          | 3.157(5)      | 120.8     |
| C(46)-H(46)...O(6)    | 0.93        | 2.58          | 3.164(4)      | 120.8     |
| <b>2</b>              |             |               |               |           |
| C(24)-H(24A)...O(2)   | 0.96        | 2.59          | 3.278(13)     | 127.6     |
| C(23)-H(23A)...O(7)#3 | 0.96        | 2.63          | 3.512(16)     | 153.5     |
| O(4)-H(4A)... N(5)#4  | 0.858(9)    | 2.602(14)     | 3.457(10)     | 175.(4)   |
| O(4)-H(4A)...O(6) #4  | 0.858(9)    | 2.48(3)       | 3.277(11)     | 155.(6)   |
| O(4)-H(4A)... O(5)#4  | 0.858(9)    | 2.00(3)       | 2.782(8)      | 151.(5)   |
| O(3)-H(3A)- O(5)#3    | 0.854(9)    | 1.924(17)     | 2.768(8)      | 169.(7)   |
| C(19)-H(19)-O(7)      | 0.93        | 2.49          | 3.347(12)     | 154.1     |
| C(21)-H(21)-O(5)#3    | 0.96        | 2.63          | 3.353(9)      | 130.4     |
| C(15)-H(15)- O(5)#4   | 0.93        | 2.42          | 3.163(10)     | 137.2     |
| C(9)-H(9)- O(6)       | 0.93        | 2.61          | 3.464(12)     | 153.2     |
| C(10)-H(10)-O(7)      | 0.96        | 2.53          | 3.455(11)     | 158.4     |

Symmetry transformations used to generate equivalent atoms: #1 x, y, z-1; #2 -x, -y, -z; #3 -x+1,-y+2,-z+1; #4 x+1,y,z.

**Table S3.** The related parameters for luminescent complexes **1** and **2**.

| Parameter                                   | <b>1</b> | <b>2</b> |
|---------------------------------------------|----------|----------|
| Emission lifetime ( $\tau_{obs}$ /us)       | 34.5     | 7.4      |
| Quantum yield ( $Q_{Sm}^{Sm}$ )             | 1.1%     | 0.2%     |
| Energy transfer efficiency( $\eta_{sens}$ ) | 39%      | 3%       |

\*The energy transfer efficiency and quantum yield were calculated through the following equation:

$$Q_{Sm}^L = \eta_{sens} Q_{Sm}^{Sm} = \eta_{sens} \tau_{obs} / \tau_{rad}$$

where  $Q_{Sm}^L$  were determined by the integrating sphere method,  $Q_{Sm}^{Sm}$  represents the intrinsic

quantum yield and  $\tau_{obs}$  and  $\tau_{rad}$  are the observed and radiative (or natural) lifetimes of the  $^4G_{5/2}$

state.

Figure S1.

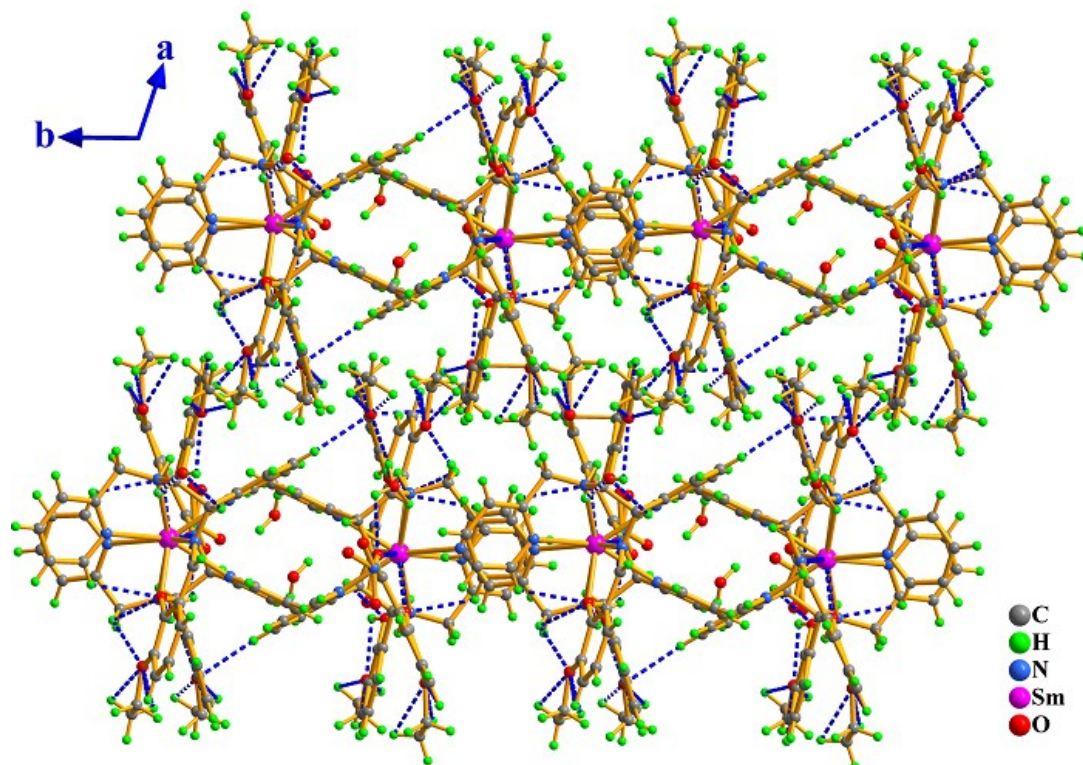

Figure S2.

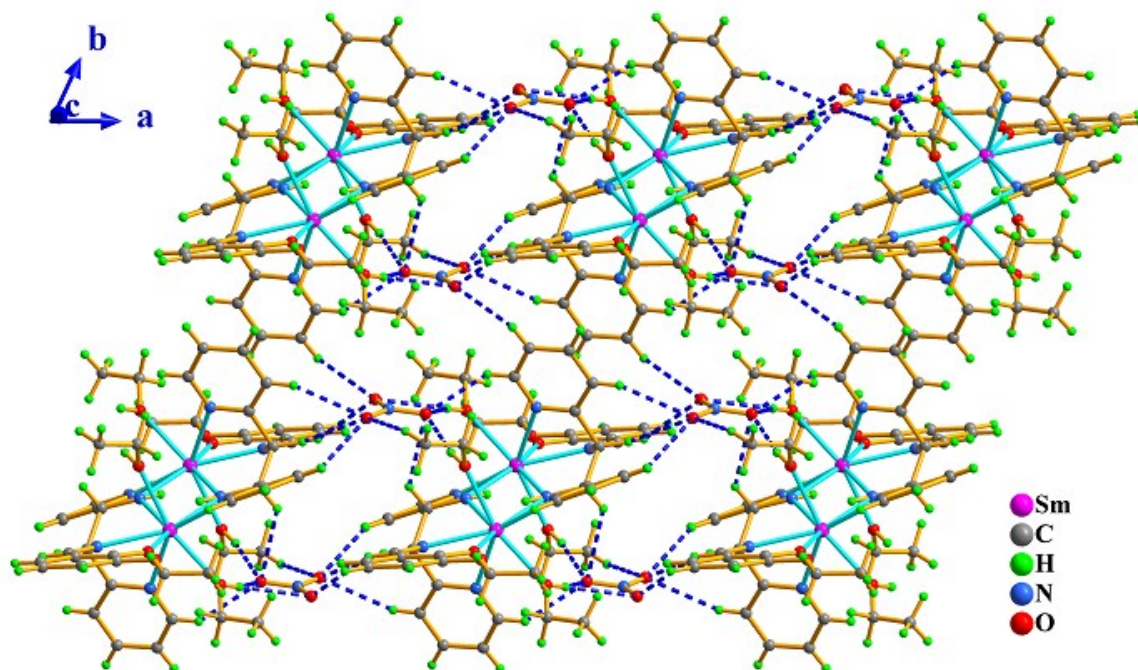

Figure S3.

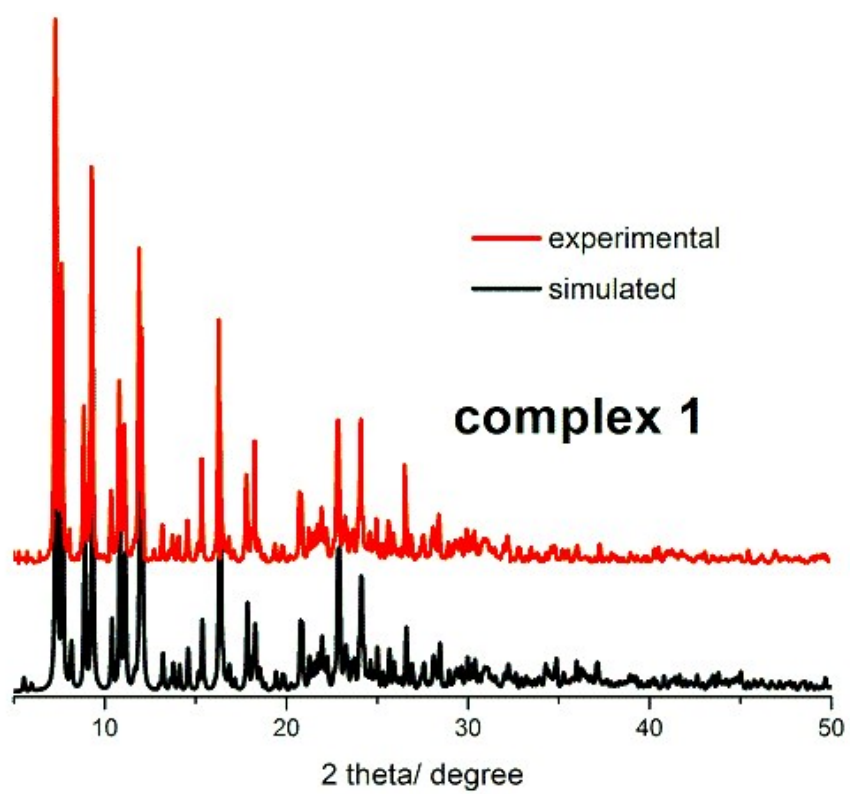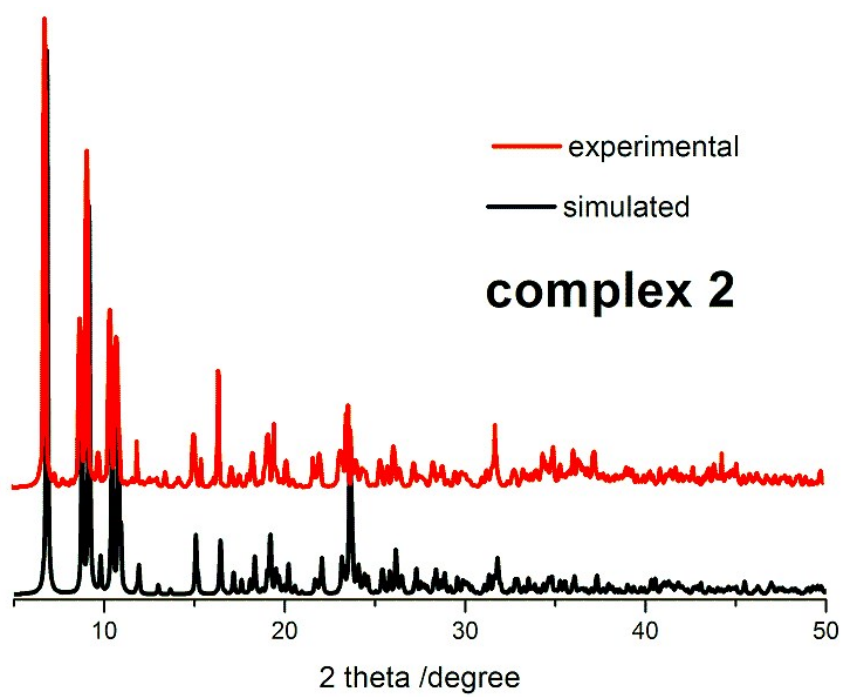

Figure S4.

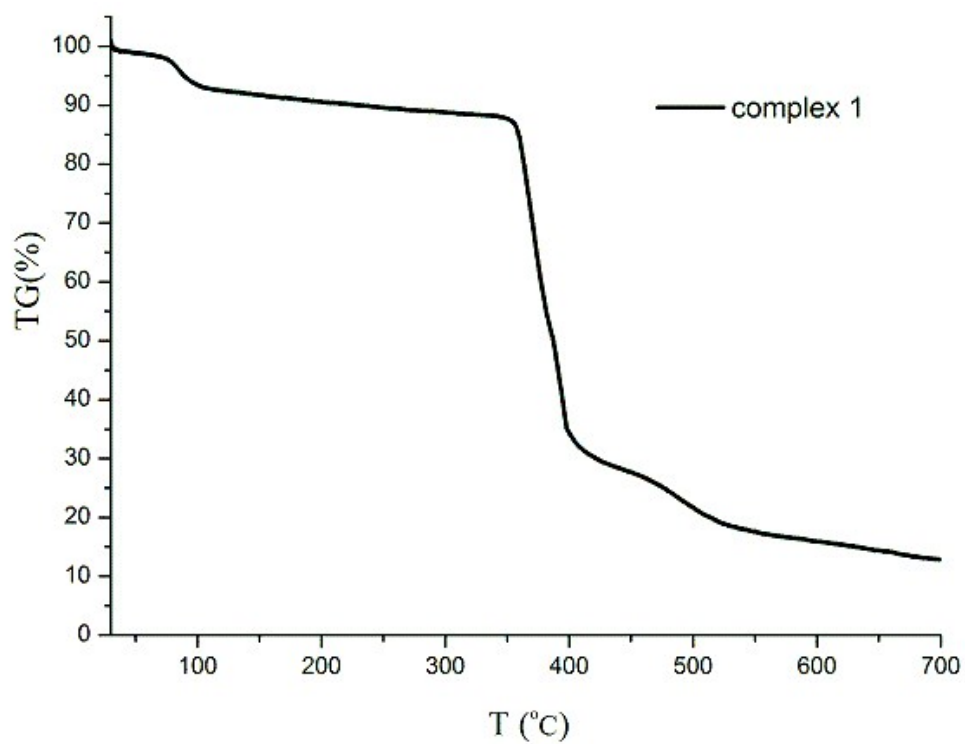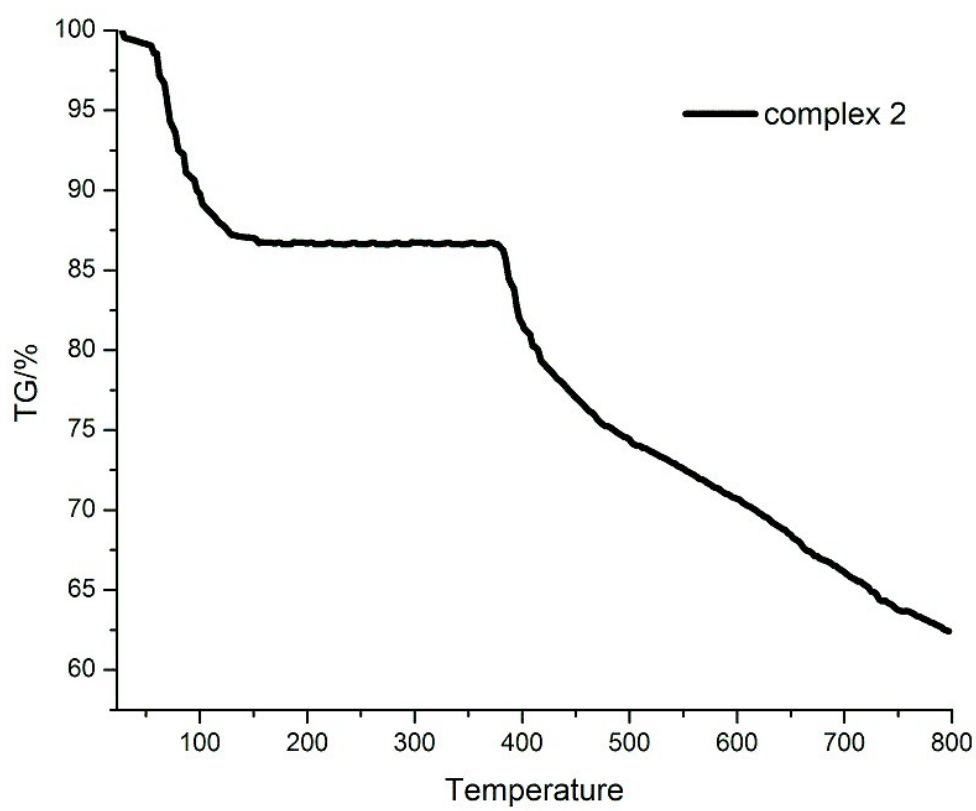



Figure S5.

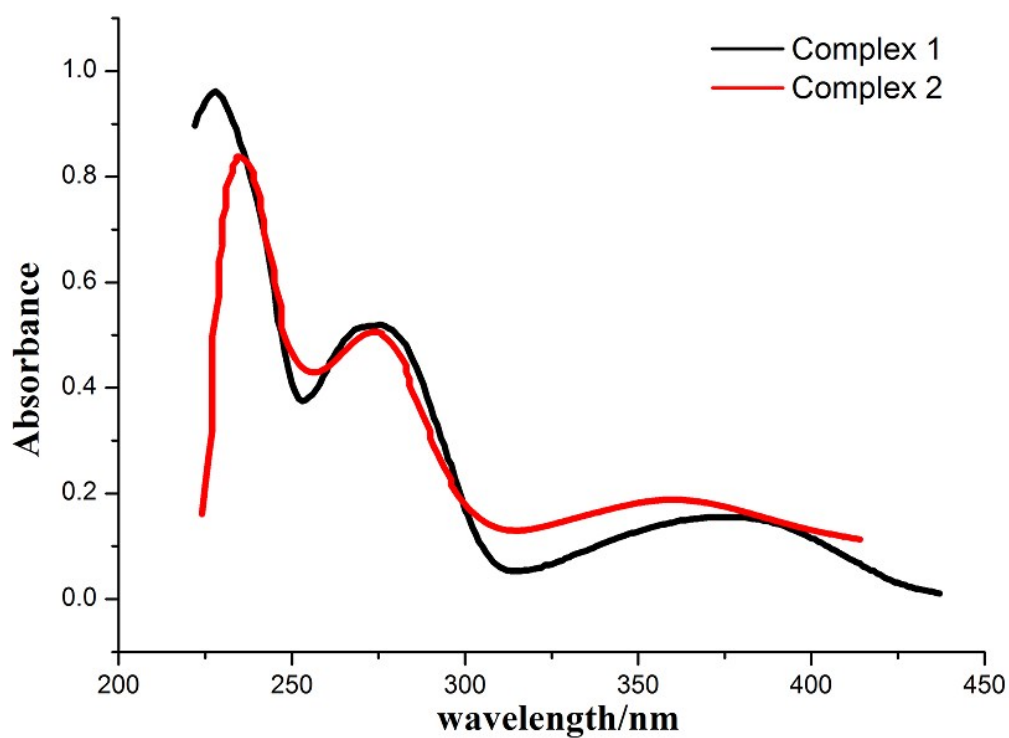

Figure S6.

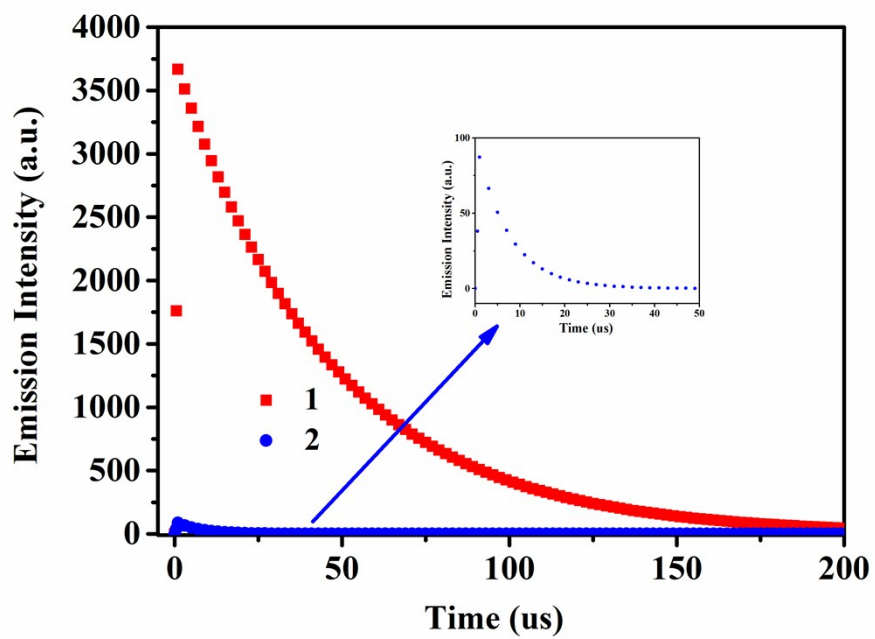

Supplement: c6ra20957b1.pdf [file c6ra20957b1.pdf]
